# Supplementary material for: Elevated RIF1 Participates in the Epigenetic Abnormalities of Zygotes by Regulating Histone Modifications on MuERV-L in Obese Mice
Source: Research Square preprint supplement (doi:10.21203/rs.3.rs-1067968/v1), 2021-11-16
Supplement: Supplementary file 1 [file baff71e46fb2d5b4e662614b.xlsx]

## Sheet: 工作表1
PCR primers used in this study
MuERVL_F	5′-CTCTACCACTTGGACCATATGAC-3′
MuERVL_R	5′-GAGGCTCCAAACAGCATCTCTA-3′
Rif1_F	5′-GCAAGGATGTTGAGACTGAGC-3′
Rif1_R	5′-TAGAGGCACTGGCAAGTATGTC-3′
GAPDH_F	5′-CTTTGTCAAGCTCATTTCCTGG-3′
GAPDH_R	5′-TCTTGCTCAGTGTCCTTGC-3′
PPARγ_F	5′-TCGCTGATGCACTGCCTATG-3′
PPARγ_R	5′-GAGAGGTCCACAGAGCTGATT-3′
SIRT3_F	5′-ATCCCGGACTTCAGATCCCC-3′
SIRT3_R	5′-CAACATGAAAAAGGGCTTGGG-3′
Telomere PCR primers used in this study
Telomere_F	5′-CGGTTTGTTTGGGTTTGGGTTTGGGTTTGGGTTTGGGTT-3′
Telomere_R	5′-GGCTTGCCTTACCCTTACCCTTACCCTTACCCTTACCCT-3′
36B4_F	5′-GTTGGGAGTTGGACTATGGAC-3′
36B5_R	5′-TGAACTGATTGGACACACACA-3′

## Sheet: 工作表2
		Telomere	5′-CGGTTTGTTTGGGTTTGGGTTTGGGTTTGGGTTTGGGTT-3′
			5′-GGCTTGCCTTACCCTTACCCTTACCCTTACCCTTACCCT-3′
		36B4	5′-GTTGGGAGTTGGACTATGGAC-3′
			5′-TGAACTGATTGGACACACACA-3′
